# Supplementary material for: MCL‑1 safeguards activated hair follicle stem cells to enable adult hair regeneration
Source: Springer Nature journal article supplement (doi:10.1038/s41467-025-58150-5), 2025-03-22
Supplement: MOESM1 [file 41467_2025_58150_MOESM1_ESM.pdf]

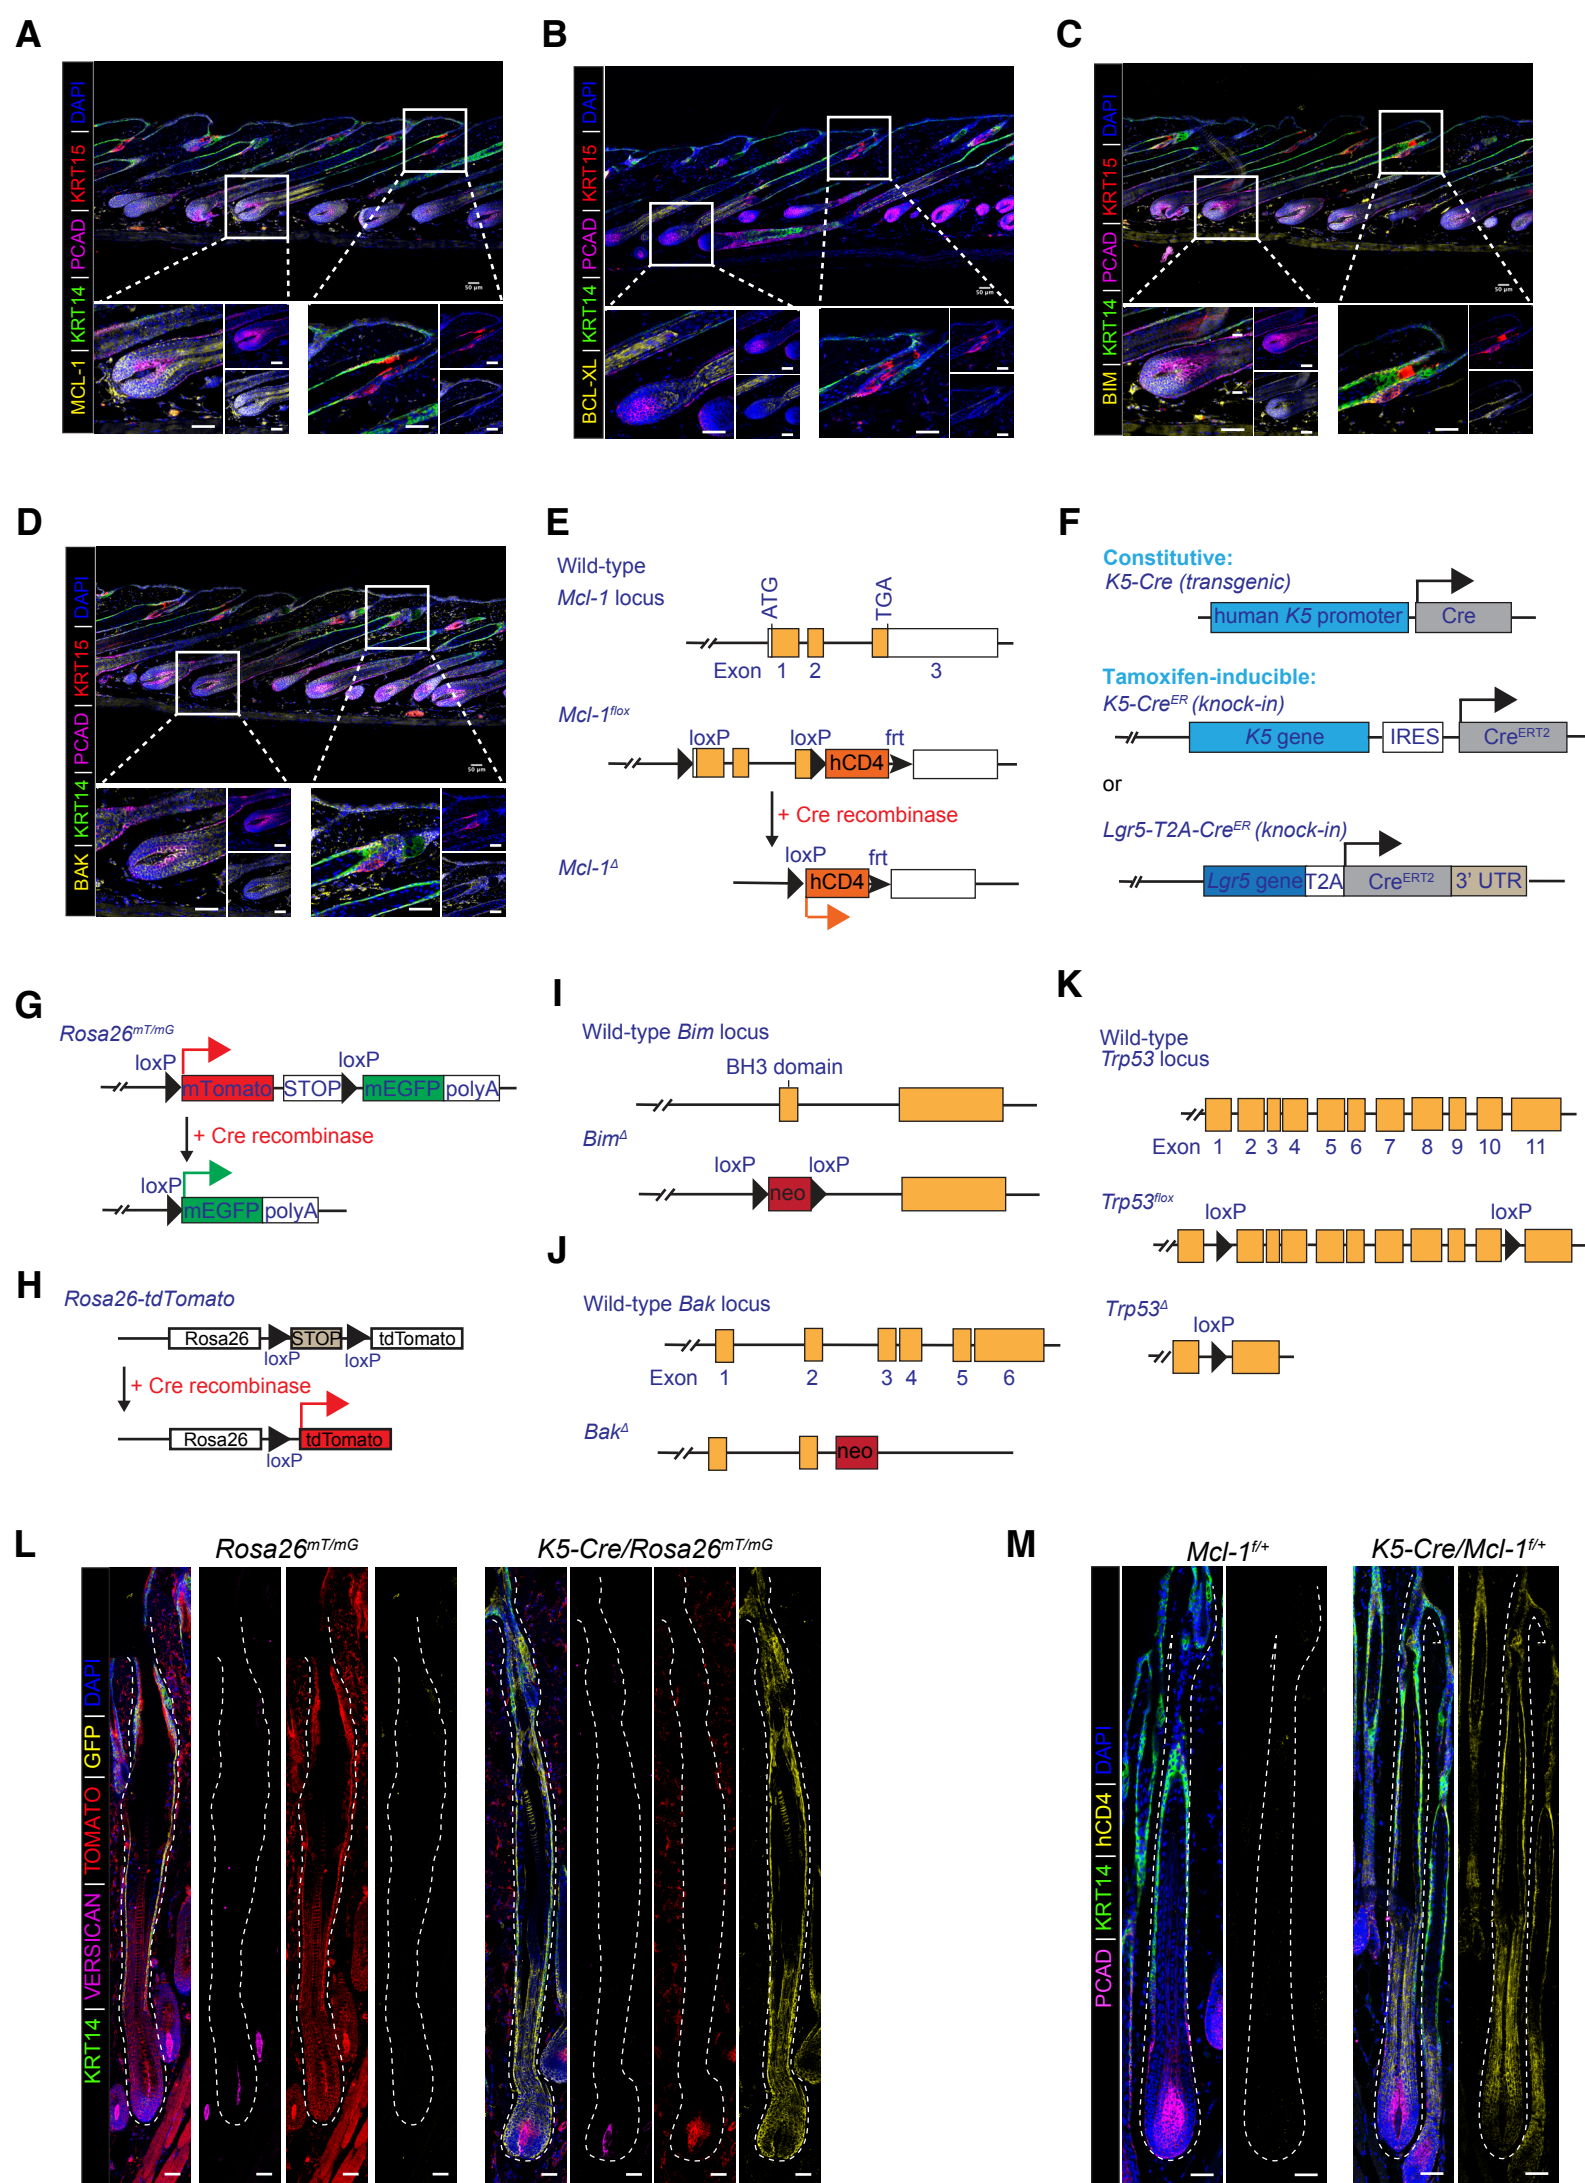

## Supplementary Figure Legends

### Figure S1. Genetic mouse model systems to interrogate the contribution of MCL-1 in regulating HF cell survival, hair growth, and hair regeneration

(A-D) Representative confocal images showing the expression of MCL-1 (A), BCL-XL (B), BIM (C), and BAK (D) in HF cells during anagen (P29). Basal skin layer is marked by KRT14, HFSCs by KRT15, and hair matrix by PCAD, with DAPI as a nuclear counterstain ( $n=4$  mice, scale bars: 50  $\mu\text{m}$ ). (E) Schematic of the floxed *Mcl-1* model, where CRE-mediated recombination deletes *Mcl-1* and activates an hCD4 reporter, indicating gene deletion and *Mcl-1* promoter activity. (F) K5 promoter-driven CRE models for skin-specific gene deletion. The constitutive K5-Cre model uses a 5 kb *Krt5* promoter to drive CRE expression, while the tamoxifen-inducible K5-CreERT2 model allows temporal control. The *Lgr5-T2A-CreER* model, generated by inserting a T2A-CRE-ERT2 cassette into the *Lgr5* gene, enables inducible deletion in *Lgr5*<sup>+</sup> HFSCs. (G-H) The *Rosa26<sup>mT/mG</sup>* CRE and *Rosa26-tdTomato* reporter models allow lineage tracing of CRE-expressing cells by switching from membrane-bound Tomato (pre-recombination) to eGFP (post-recombination) (G) or activating the expression of Tomato (H). (I-K) Gene knockout strategies for apoptosis regulators. *Bim* knockout (I) disrupts the BH3 domain via a neomycin resistance cassette. *Bak* knockout (J) removes exons encoding BH1-3 domains. *Trp53* floxed (K) mice contain loxP sites flanking exons 2-10, allowing CRE-mediated deletion of *Trp53*. (L) Validation of K5 promoter-driven CRE recombinase activity. The K5-Cre/*Rosa26<sup>mT/mG</sup>* model confirms high specificity and efficiency of CRE activity in the skin epithelium. Confocal images show GFP and Tomato expression, with versican labelling dermal papilla ( $n=3$  mice, scale bars: 50  $\mu\text{m}$ ). (M) Confirmation of *Mcl-1* deletion using the hCD4 reporter. Confocal images show hCD4 expression in *K5-Cre/Mcl-1<sup>f/+</sup>* mice compared to control littermates ( $n=5$  mice, scale bars: 50  $\mu\text{m}$ ). Basal skin is stained by KRT14, TACs by PCAD, and nuclei by DAPI.

**A**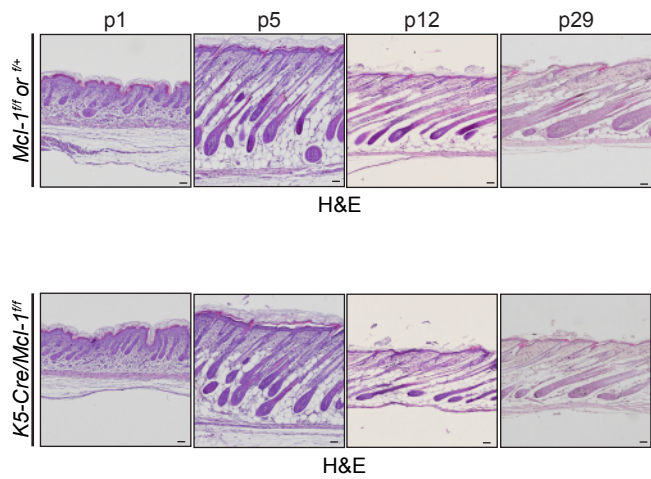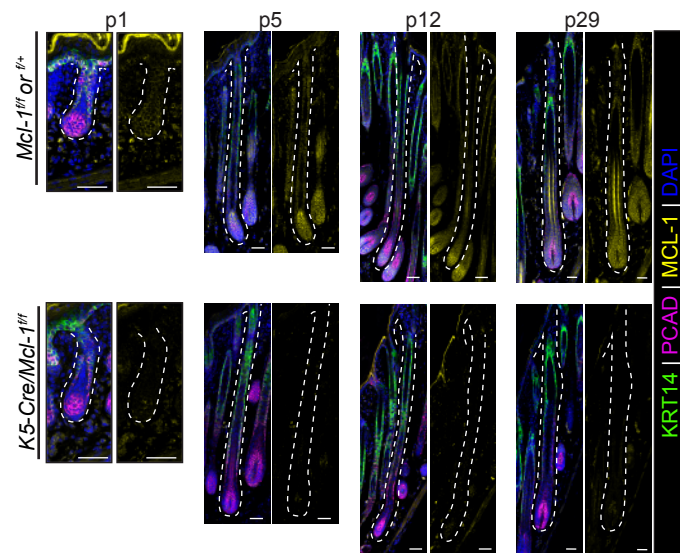**B**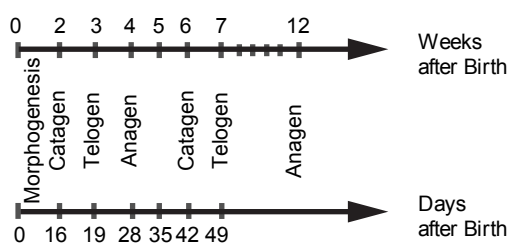**C**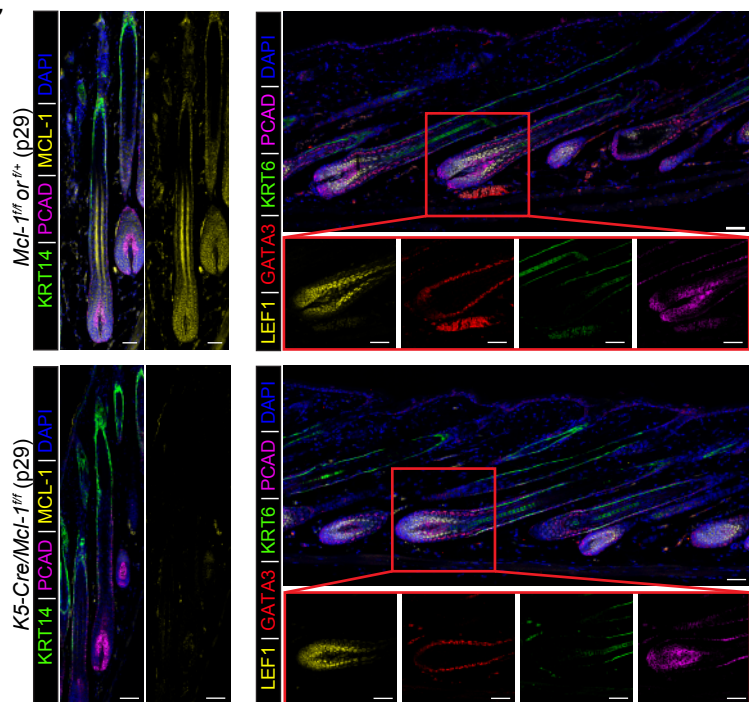**D**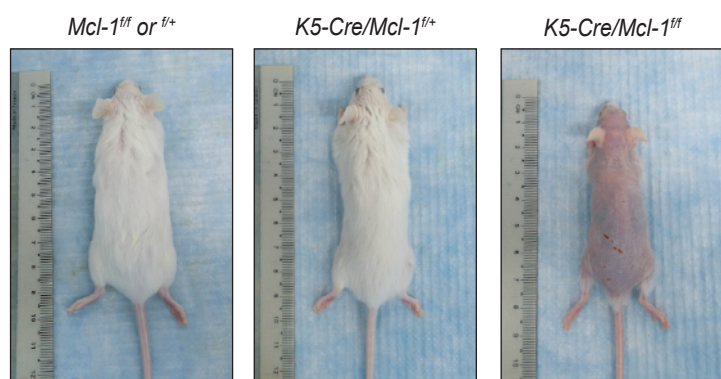**E**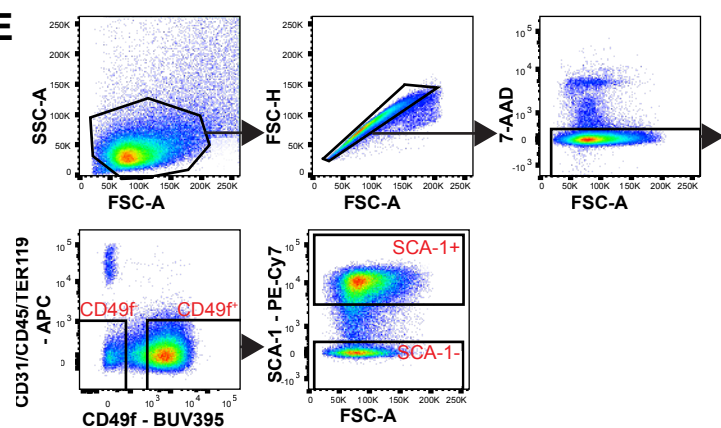**F**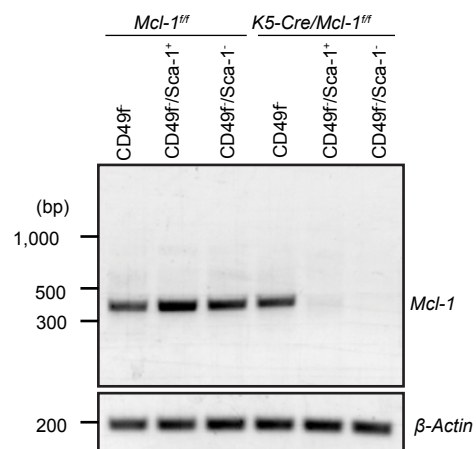**G**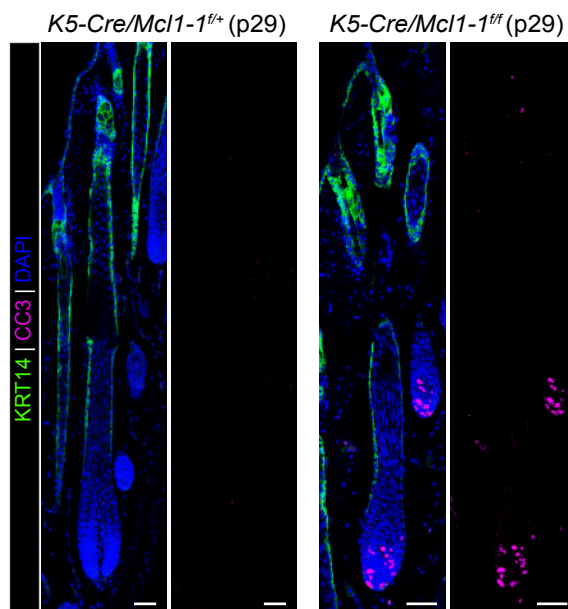

**Figure S2: The absence of MCL-1 does not affect HF organogenesis but results in premature hair loss**

**(A)** Representative images of H&E-stained histological sections and confocal images showing that *Mcl-1* deficiency does not impair HF morphogenesis nor early stages of HF growth up to p29. Scale bars, 50  $\mu$ m. n=4 mice per genotype for each development stage. **(B)** Schematic illustration of the postnatal HF development in mice. After birth, HFs undergo morphogenesis. The first postnatal hair cycle is synchronous and occurs between p20 (first telogen stage) to p55 (second telogen stage). After that, the HF cycling only occurs in small patches. **(C)** Representative confocal images of HF matrix and cortex (LEF1), inner root sheath (GATA3), suprabasal ORS and medulla (KRT6) in *K5-Cre/Mcl-1<sup>ff</sup>* mice and *Mcl-1<sup>ff</sup>* or *Mcl-1<sup>f/+</sup>* littermate control mice. Scale bars, 50  $\mu$ m. n=3 mice per genotype. **(D)** Representative photographs showing complete loss of hair in adult *Mcl-1* conditional knockout mice. *Mcl-1<sup>ff</sup>* or *f/+*, *K5-Cre/Mcl-1<sup>f/+</sup>* and *K5-Cre/Mcl-1<sup>ff</sup>* mice at the age of more than 5 months. n=9 mice per genotype. **(E)** Strategy for FACS sorting of skin cell subpopulations. Representative FACS plots showing the non-epithelial cells (CD49f<sup>-</sup>), HF (CD49f<sup>+</sup>/SCA-1<sup>-</sup>) and interfollicular epidermis (CD49f<sup>+</sup>/SCA-1<sup>+</sup>) cell subsets. **(F)** Representative gel images showing efficient deletion of the floxed *Mcl-1* gene in interfollicular epidermis (CD49f<sup>+</sup>/SCA-1<sup>+</sup>) and HF (CD49<sup>+</sup>/SCA-1<sup>-</sup>) cells but not in non-epidermal cells (CD49f<sup>-</sup>) in *K5-Cre/Mcl-1<sup>ff</sup>* mice compared to *Mcl-1<sup>ff</sup>* littermates. Skin cell subsets defined by CD49f and SCA-1 expression were FACS sorted and *Mcl-1* transcripts were amplified by RT-PCR. n=2 independent experiments. **(G)** The presence of one *Mcl-1* allele is sufficient to prevent apoptosis in the skin of *K5-Cre/Mcl-1<sup>f/+</sup>* mice. Representative confocal image showing the absence of activated CC3<sup>+</sup> cells in the skin from *K5-Cre/Mcl-1<sup>f/+</sup>* and *K5-Cre/Mcl-1<sup>ff</sup>* mice during mid anagen (p29) (n=5 mice per genotype). Basal skin layer is stained by KRT14, hair matrix containing TACs is stained by PCAD and DAPI is used as a nuclear counterstain in each image in panel (A, C and G).

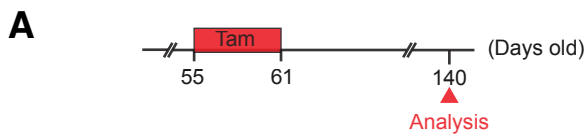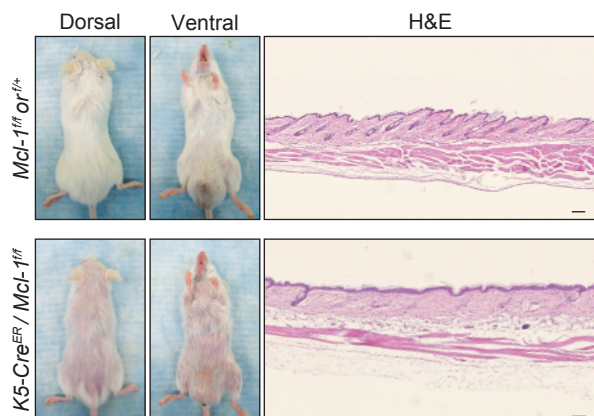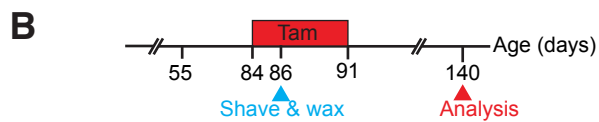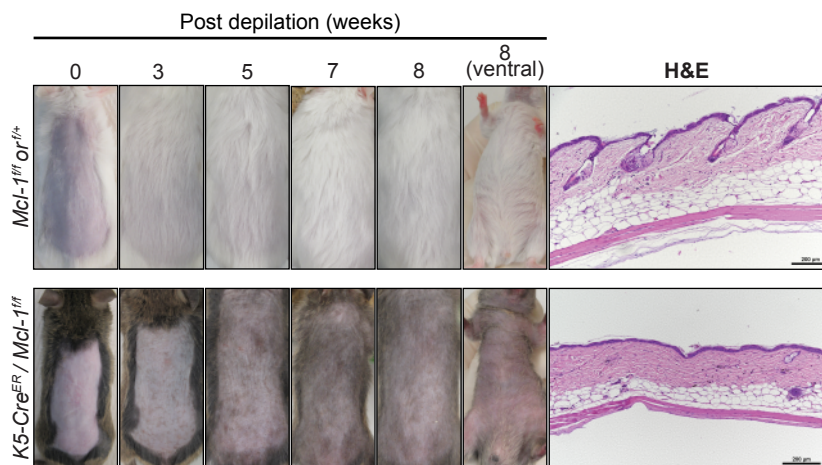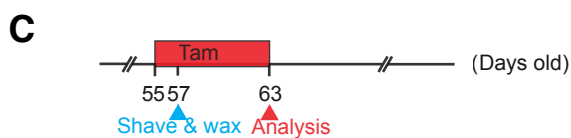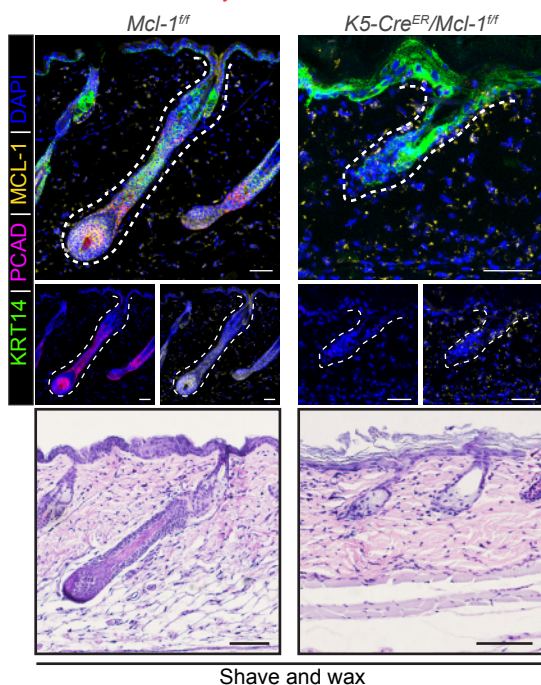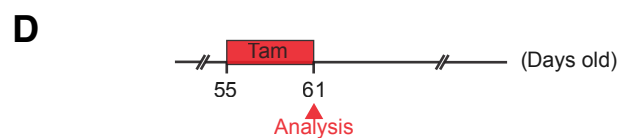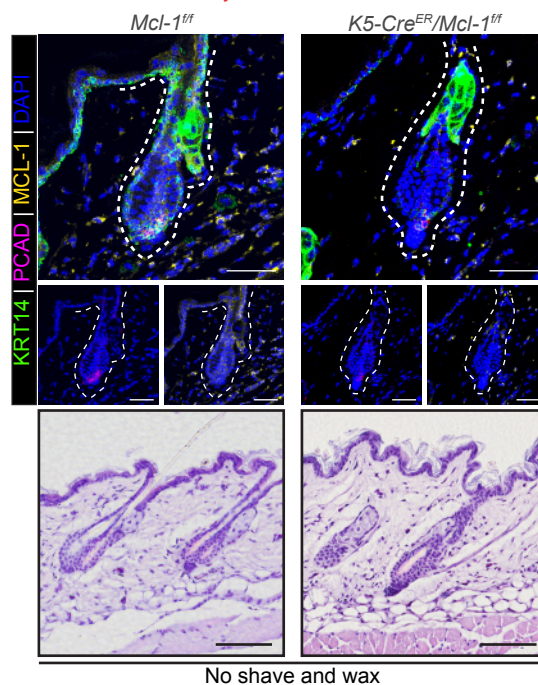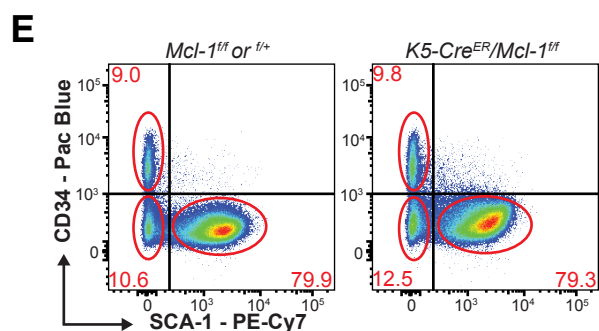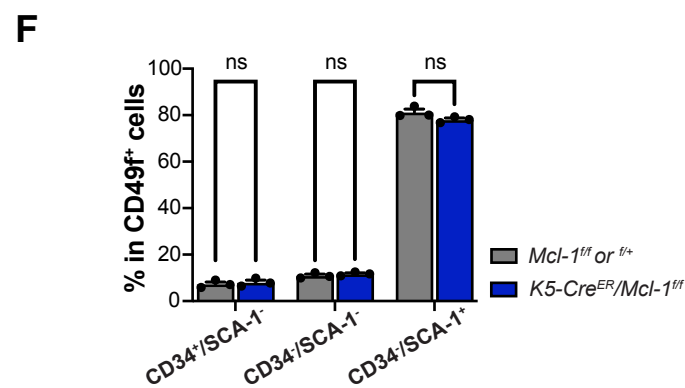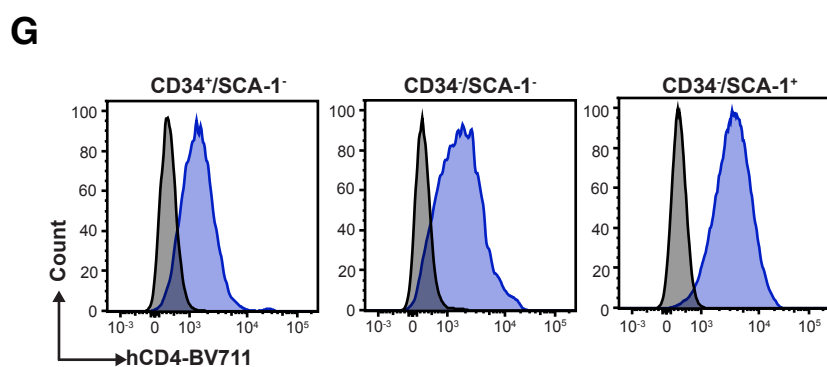

**Figure S3: Acute deletion of the *Mcl-1* gene in adult mice does not result in the immediate loss of quiescent CD34<sup>+</sup> bulge stem cell populations**

(A) Inducible deletion of *Mcl-1* during adulthood leads to progressive hair loss. Mice at P55 (second telogen) were placed on a tamoxifen-containing diet for one week to delete *Mcl-1* in Krt5-expressing cells. Mice were aged and monitored. Representative photographs and H&E-stained skin sections of K5-CreER/*Mcl-1*<sup>f/f</sup> and control (*Mcl-1*<sup>f/f</sup>) mice at P140. (*n*=6 mice per genotype, scale bars: 100 μm). (B) *Mcl-1* deletion during an asynchronized hair cycle impairs hair regeneration. Tamoxifen-induced deletion was initiated at P84, and a portion of the dorsal skin was shaved and waxed to induce hair regeneration. Representative images of K5-Cre<sup>ER</sup>/*Mcl-1*<sup>f/f</sup> and control mice at 0, 2, 5, 7, and 8 weeks post-depilation. H&E-stained skin sections at P140. (*n*=6 mice per genotype, scale bars: 200 μm). (C, D) *Mcl-1* deletion results in the loss of PCAD<sup>+</sup> hair germ cells only after depilation. Mice were analyzed 6 days after tamoxifen administration with (C) or without (D) depilation. Representative H&E-stained sections and confocal images of MCL-1, KRT14, and PCAD in the dorsal skin of K5-Cre<sup>ER</sup>/*Mcl-1*<sup>f/f</sup> and control mice. (*n*=3 mice per genotype, scale bars: 50 μm). (E, F) FACS analysis of epithelial cell populations 6 days after tamoxifen administration. Representative FACS plots (E) and quantification (F) of CD49f<sup>+</sup> epithelial cells fractionated by CD34 and SCA-1 expression in K5-Cre<sup>ER</sup>/*Mcl-1*<sup>f/f</sup> and control mice. (*n*=8 mice per genotype, data shown as mean ± SEM, n.s. = non-significant; Student's t-test). (G) Efficient *Mcl-1* deletion confirmed by hCD4 reporter expression. FACS analysis showing high hCD4 expression in hair bulge cells (CD49f<sup>+</sup>/CD34<sup>+</sup>/SCA-1<sup>-</sup>), non-bulge follicular cells (CD49f<sup>+</sup>/CD34<sup>-</sup>/SCA-1<sup>-</sup>), and interfollicular epidermis (CD49f<sup>+</sup>/CD34<sup>-</sup>/SCA-1<sup>+</sup>) from K5-Cre<sup>ER</sup>/*Mcl-1*<sup>f/f</sup> mice, but not in controls. (*n*=3 mice per genotype).

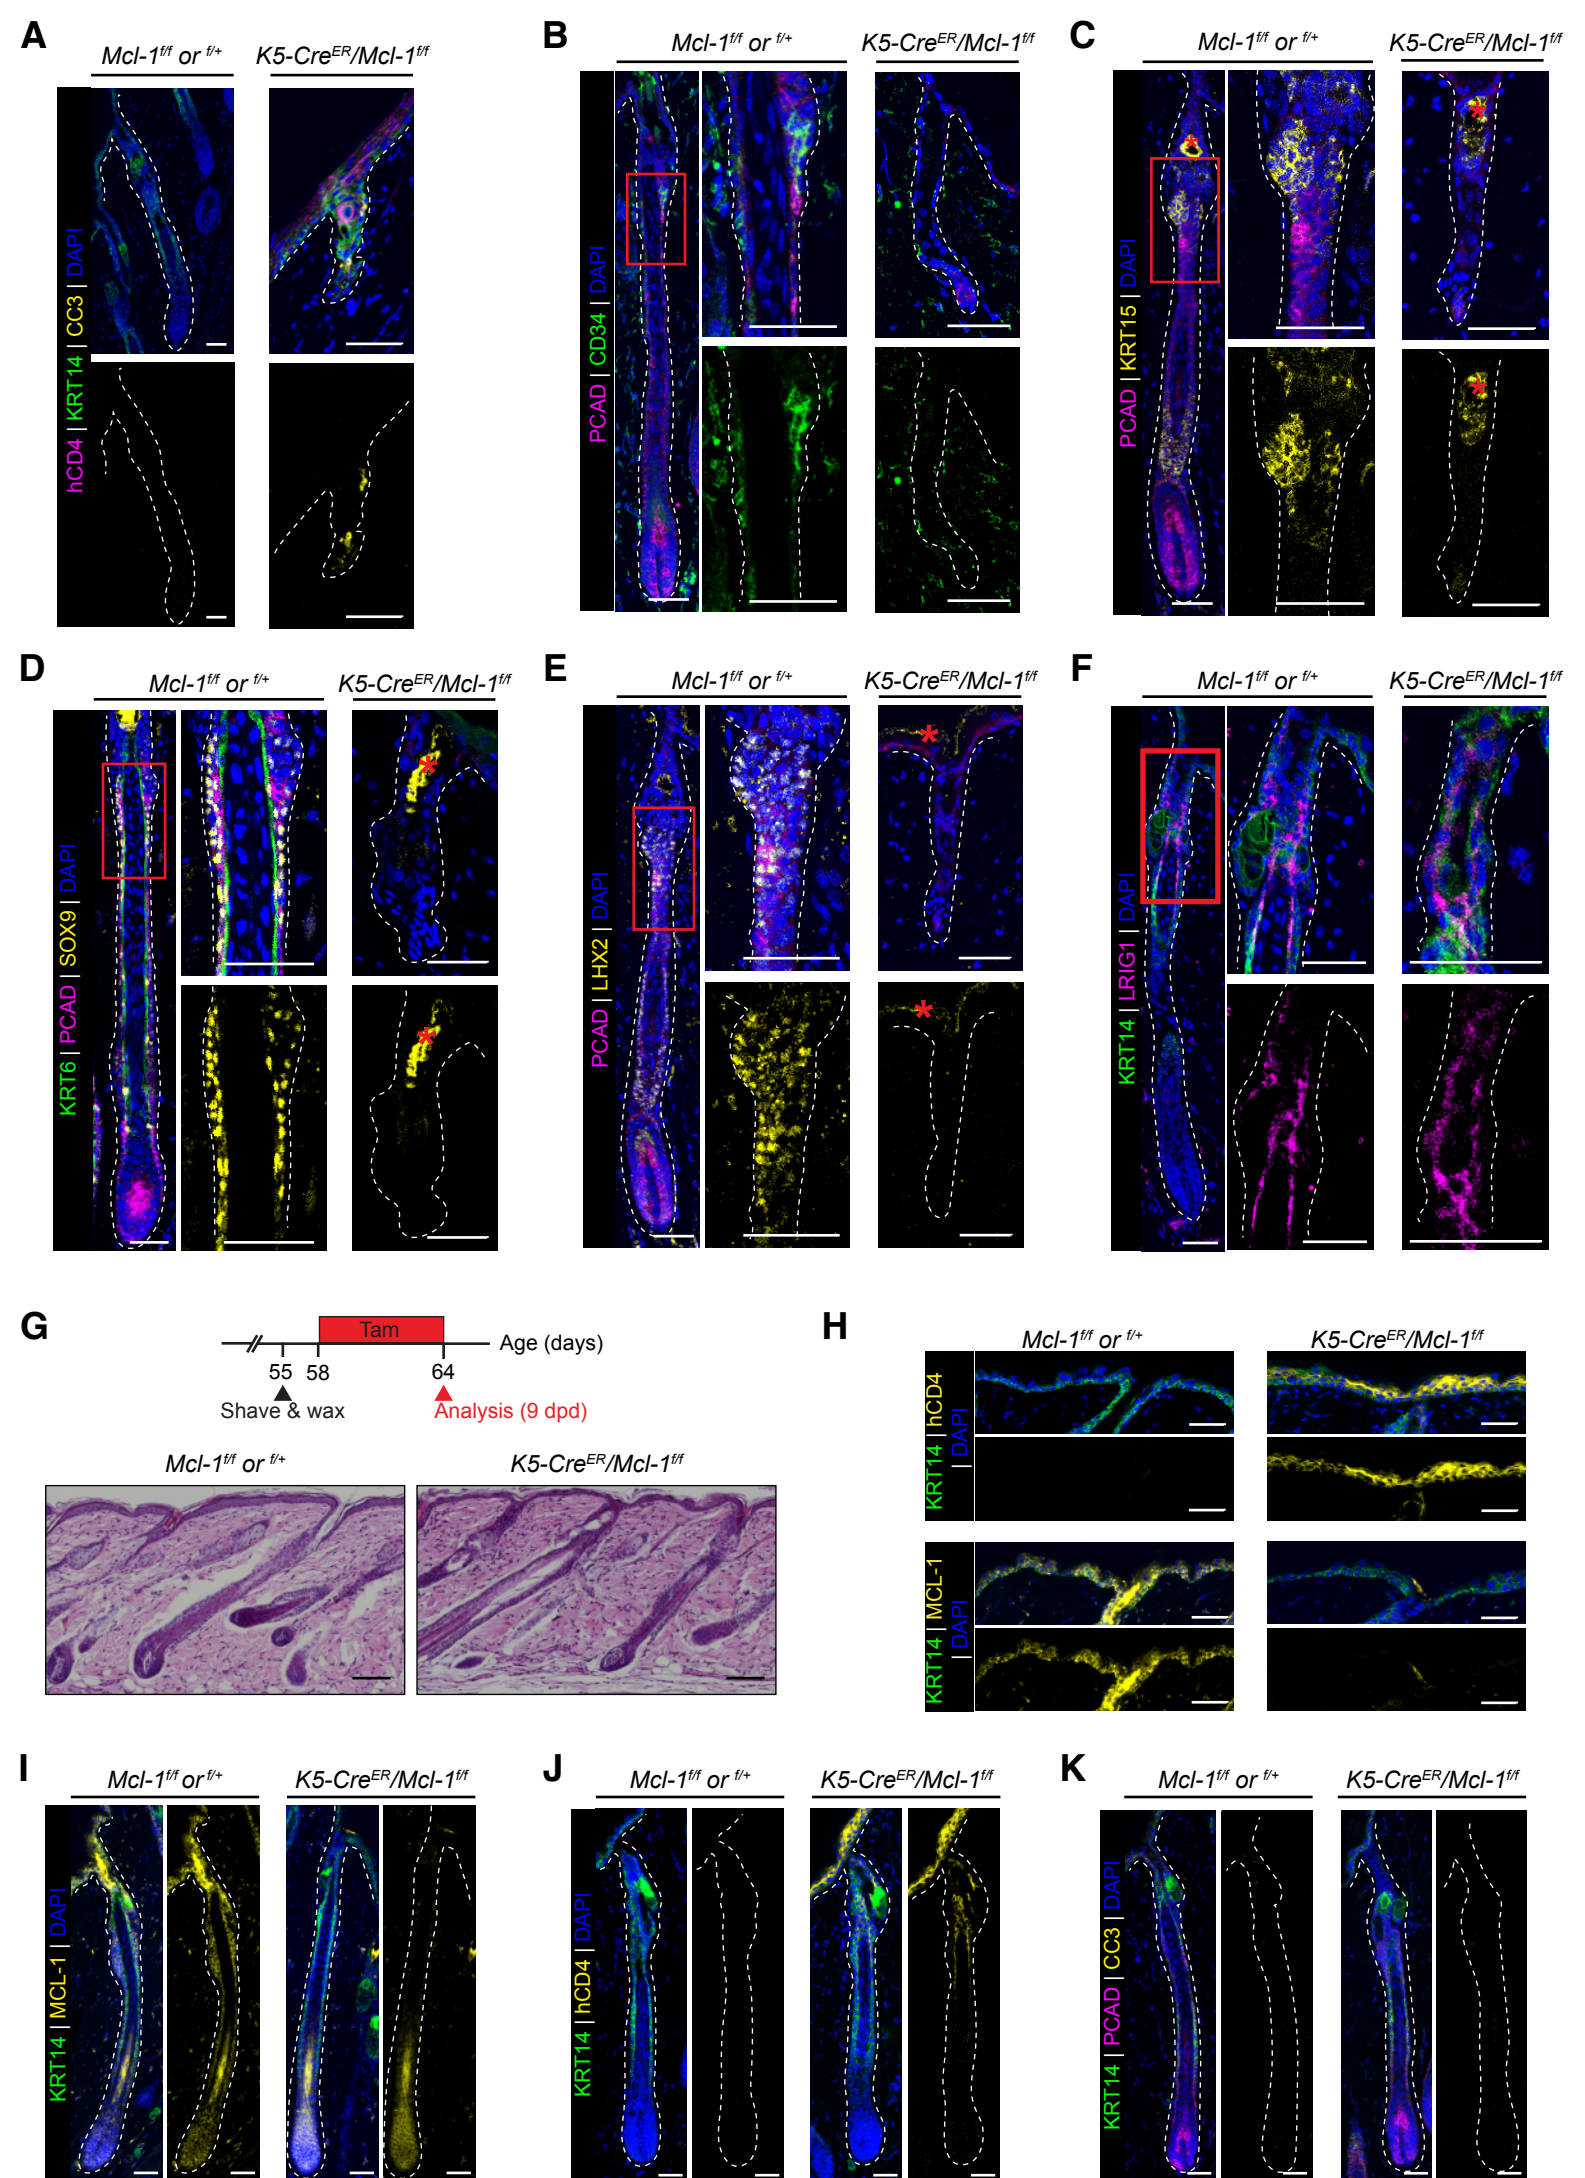

**Figure S4: Acute deletion of Mcl-1 leads to the loss of the heterogeneous pool of HFSC**

(A) Representative confocal image showing increased apoptotic cells as marked by CC3 9 dpd in *Mcl-1*-deficient (hCD4<sup>+</sup>) HF of *K5-Cre<sup>ER</sup>/Mcl-1<sup>ff</sup>* mice. (B-F) Confocal image analyses of HFSCs as marked by CD34 (B), KRT15 (C), SOX9 (D), LHX2 (E) and LRIG1 (F) in HF of *K5-Cre<sup>ER</sup>/Mcl-1<sup>ff</sup>* mice 9 dpd. MCL-1 (A), (n=9 mice per genotype). Scale bars: 50  $\mu$ m. (G-K) Experimental strategy for to induce deletion of *Mcl-1* specifically in the interfollicular epidermis of adult *K5-Cre<sup>ER</sup>/Mcl-1<sup>ff</sup>* mice. A portion of the dorsal skin was shaved and waxed to induce hair regeneration, and *Mcl-1* deletion was induced 3 dpd via tamoxifen-containing diet. Dorsal skin samples were harvested 9 dpd. Representative H&E-stained histological sections (G) and confocal image analysis of MCL-1 and hCD4 (H), MCL-1 (I), hCD4 (J), and CC3 (K) expressions in the dorsal skin from *K5-Cre<sup>ER</sup>/Mcl-1<sup>ff</sup>* mice and control littermates after administration of tamoxifen diet 3 days following depilation. Scale bars, 50  $\mu$ m. n=9 mice per genotype. Basal skin layer is stained by KRT14, IRS stained by KRT6, hair matrix containing TACs is stained by PCAD and DAPI is used as a nuclear counterstain where applicable in each confocal image.

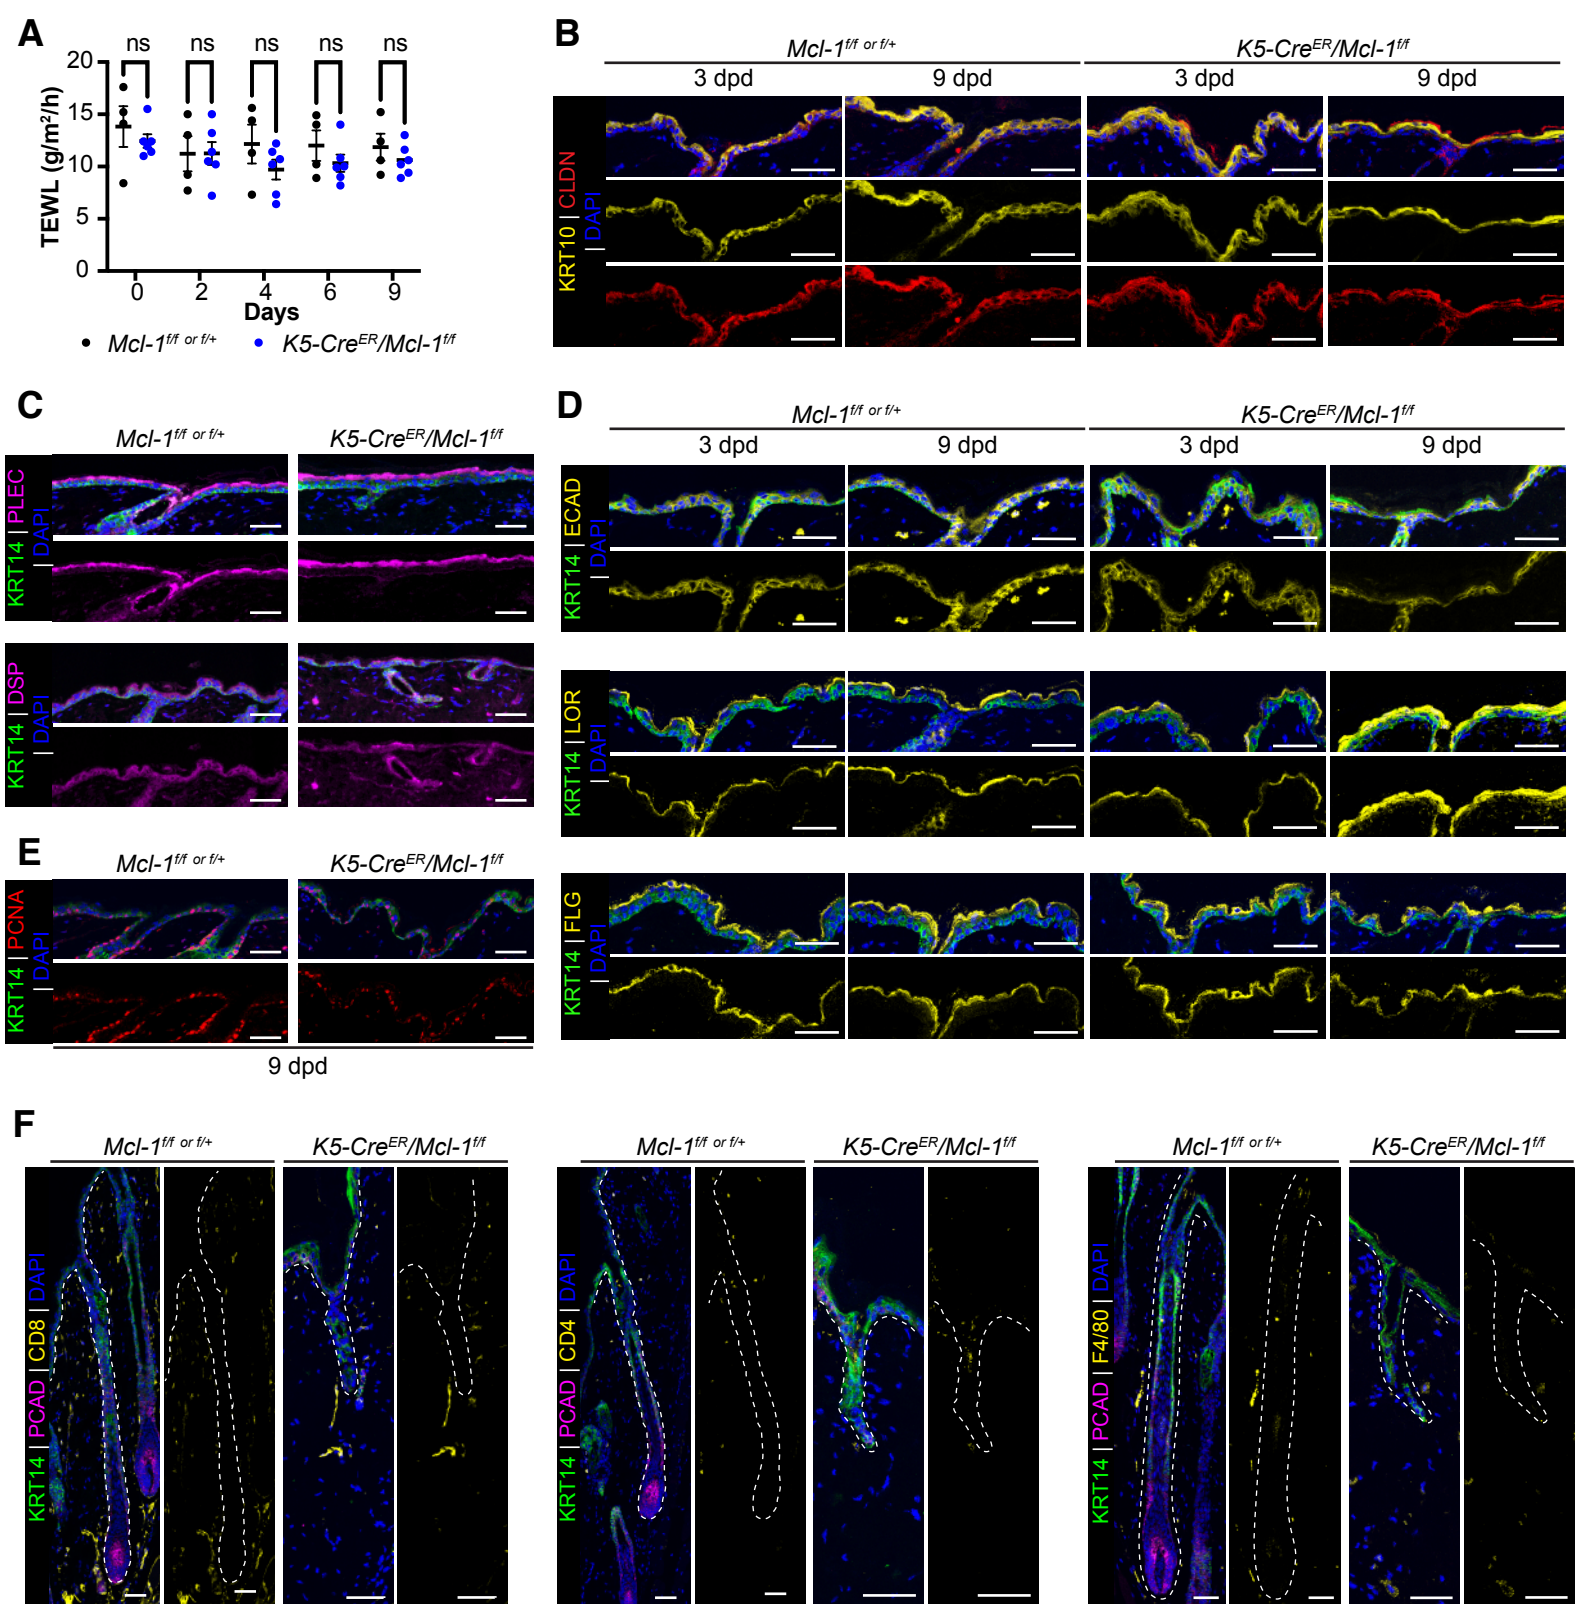

**Figure S5: MCL-1 deficiency does not impact skin stratification, skin barrier and skin cell structure.**

(A) Transepidermal water loss from the dorsal skin of *K5-Cre<sup>ER</sup>/Mcl-I<sup>ff</sup>* mice and control littermates were measured at 0, 2, 4, 6 and 9 days post depilation. Data are presented as mean  $\pm$  SEM (n=4-5 mice per genotype). n.s. = non-significant. Student's t-test. (B-E) Representative confocal images showing skin stratification markers, CLAUDIN-1 (CLDN1) and KRT10 (B), skin structure markers PLECTIN (PLEC), DESMOPLAKIN (DSP) (C), skin barrier markers E-CADHERIN (ECAD), LORICRIN (LOR), and FILLAGRIN (FLG) (D), and proliferation marker PCNA (E) in dorsal skins of *K5-Cre/Mcl-I<sup>ff</sup>* mice and *Mcl-I<sup>ff</sup>* or *Mcl-I<sup>f/+</sup>* littermate control mice at 3 or 9 dpd. (F) Representative confocal image analysis of CD8 (T cells), CD4 (T cells), F4/80 (macrophage) in dorsal skins of *K5-Cre/Mcl-I<sup>ff</sup>* mice and *Mcl-I<sup>ff</sup>* or *Mcl-I<sup>f/+</sup>* littermate control mice at 9 dpd. Scale bars, 50  $\mu$ m. n=9 mice per genotype. Basal skin layer is stained by KRT14, hair matrix containing TACs is stained by PCAD and DAPI is used as a nuclear counterstain where applicable in each confocal image.

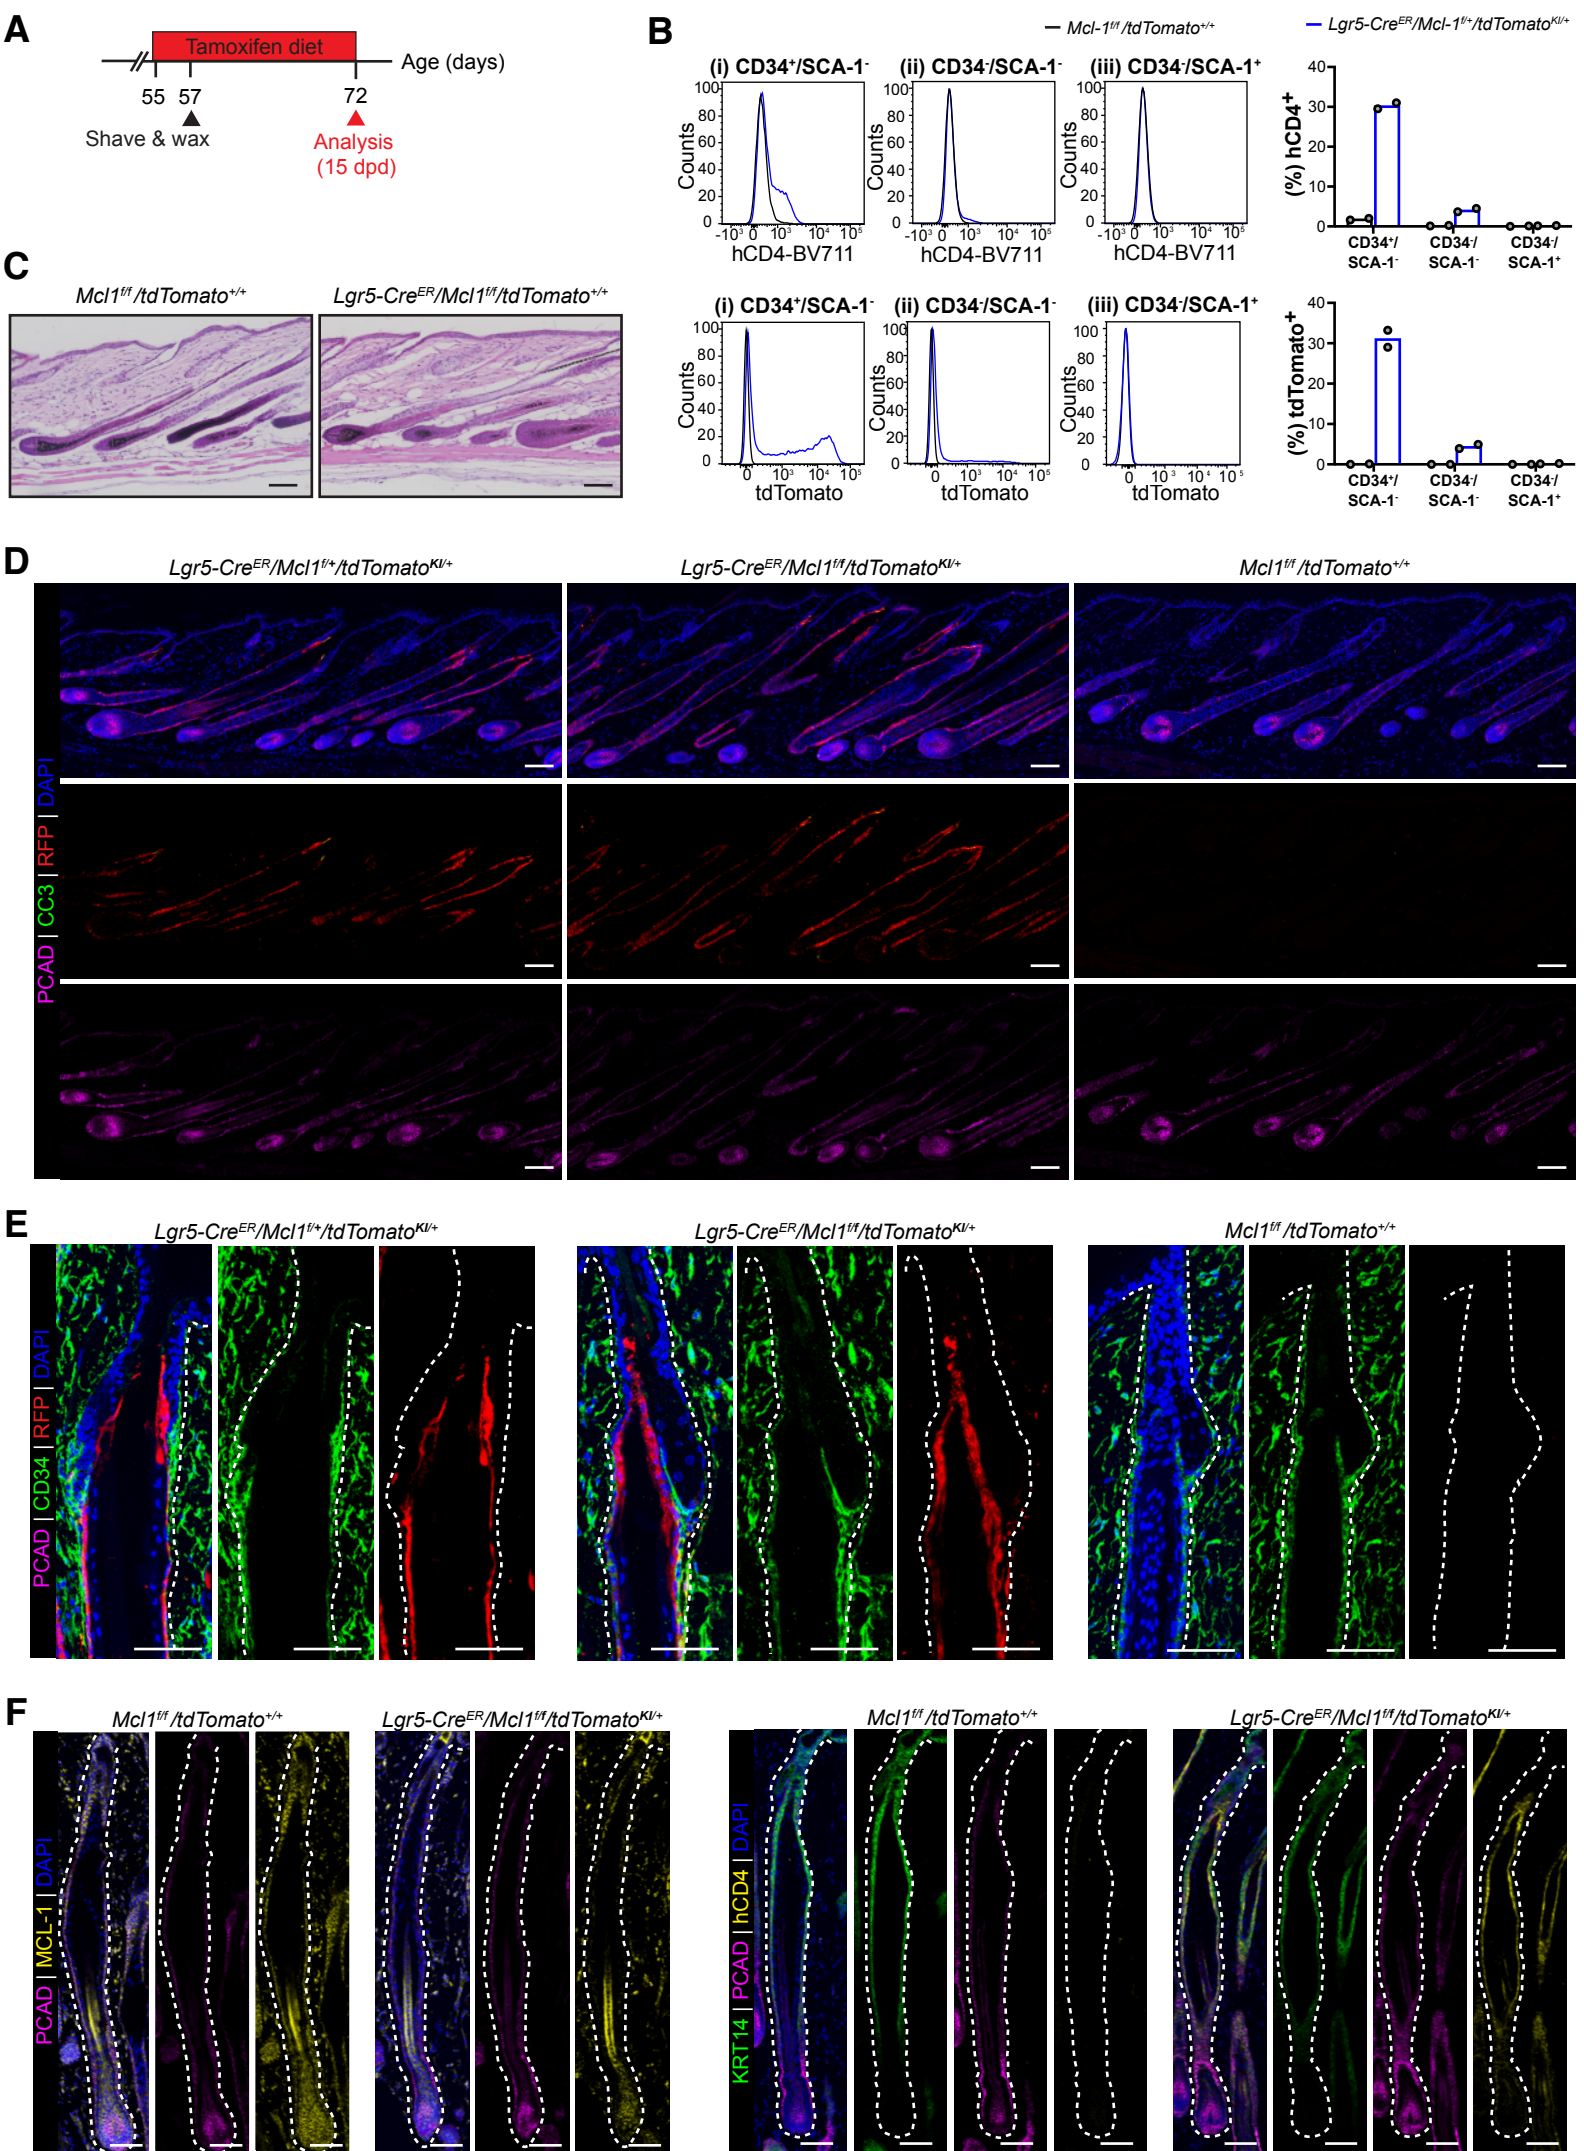

**Figure S6: *Mcl-1* deletion in *Lgr5*<sup>+</sup> HFSCs does not impair hair regeneration in adult mice.** (A) Mice at p55 (the second telogen phase) were placed on tamoxifen containing diet throughout the experiment (from p55-p72) to induce *Mcl-1* deletion in *Lgr5*-expressing HFSCs and their progeny. Dorsal skin was shaved and waxed at p57 to induce hair regeneration and subsequently harvested at 15 days post depilation (dpd). (B) Representative FACS plots showing the expression of tdTomato and hCD4, as markers of Cre-mediated recombination and *Mcl-1* deletion, in different subsets of HF cells. Bar graph shows mean from n=2 mice for indicated genotypes. (C) Representative images of H&E-stained histological sections of the skin from *Lgr5-Cre<sup>ER</sup>/Mcl-1<sup>ff</sup>/tdTomato<sup>+/+</sup>* (or *Lgr5-Cre<sup>ER</sup>/Mcl-1<sup>ff</sup>/tdTomato<sup>KI/+</sup>*) and *Mcl-1<sup>ff</sup>/tdTomato<sup>+/+</sup>* (or *Mcl-1<sup>ff</sup>/tdTomato<sup>KI/+</sup>*) control mice at 15 dpd. Scale bars, 100  $\mu$ m. n=3 mice per genotype. (D) Representative confocal images showing cleaved caspase 3 (CC3), tdTomato<sup>+</sup> (RFP), PCAD in skin sections of *Lgr5-Cre<sup>ER</sup>/Mcl-1<sup>ff</sup>/tdTomato<sup>KI/+</sup>*, *Lgr5-Cre<sup>ER</sup>/Mcl-1<sup>ff</sup>/tdTomato<sup>KI/+</sup>* and *Mcl-1<sup>ff</sup>/tdTomato<sup>+/+</sup>* mice at 15 dpd. Tissue sections were counterstained with DAPI. Scale bars, 100  $\mu$ m. n=4 mice per genotype. (E) Representative confocal images of tdTomato (RFP) and HFSCs as marked by CD34 in HF of *Lgr5-Cre<sup>ER</sup>/Mcl-1<sup>ff</sup>/tdTomato<sup>KI/+</sup>*, *Lgr5-Cre<sup>ER</sup>/Mcl-1<sup>ff</sup>/tdTomato<sup>KI/+</sup>* and *Mcl-1<sup>ff</sup>/tdTomato<sup>+/+</sup>* mice at 15 dpd. Tissue sections were counterstained with DAPI. Scale bars, 100  $\mu$ m. n=4 mice per genotype. (F-G) Representative confocal images of MCL-1 (F), hCD4 (G), PCAD and KRT14 in HF of *Lgr5-Cre<sup>ER</sup>/Mcl-1<sup>ff</sup>/tdTomato<sup>KI/+</sup>* and *Mcl-1<sup>ff</sup>/tdTomato<sup>+/+</sup>* mice at 15 dpd. Cell nuclei were counterstained with DAPI. Scale bars, 50  $\mu$ m. n=4 mice per genotype.



**Figure S7. Comprehensive single-cell transcriptome atlas of murine dorsal skin at early depilation-induced anagen**

(A) UMAP visualization of all cells in the murine dorsal skin across six time points at the early anagen stages of hair regeneration after depilation, colored according to the main cell classes. The plot was generated by integration of 6343, 6955, 7806, 8359, 10740 and 8574 cells for 0 h, 4 h, 16 h, 2 d, 4 d and 6 d post depilation, respectively. (B) Dot plot of marker genes used for annotation of cell clusters in (A). The colour scales correspond to the averaged expression levels. The dot size corresponds to the ratio of cells expressing the gene in the cell type. (C) UMAP visualization of all cells in the dorsal skin sample for each time point post-depilation as indicated. (D) Percentage of cell types in the dorsal skin sample for each time point post-depilation as indicated. (E) Number of DE genes for each cell type along developmental time course. (F) Dot plot of ERBB ligands and receptors in each cell type. (G) Line chart of average expression of genes in the ERBB signaling pathway along developmental time course for the cells in the OB1 cluster. (H) Expression plot of *Bcl-2* family genes in all cells. The same UMAP plot in (A), colored by the relative expression (gray=low, blue=high).

**A**

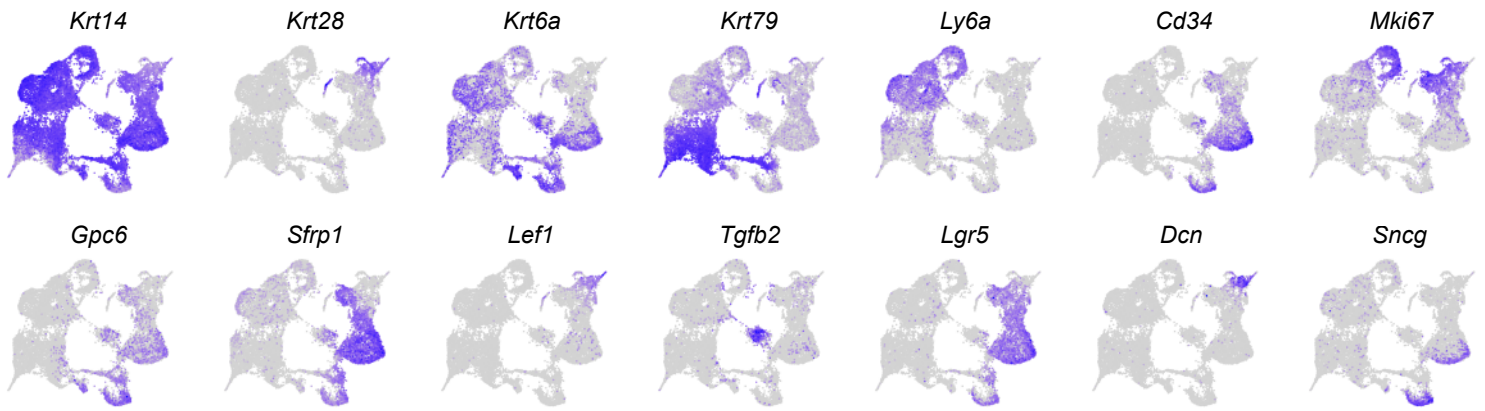

# B

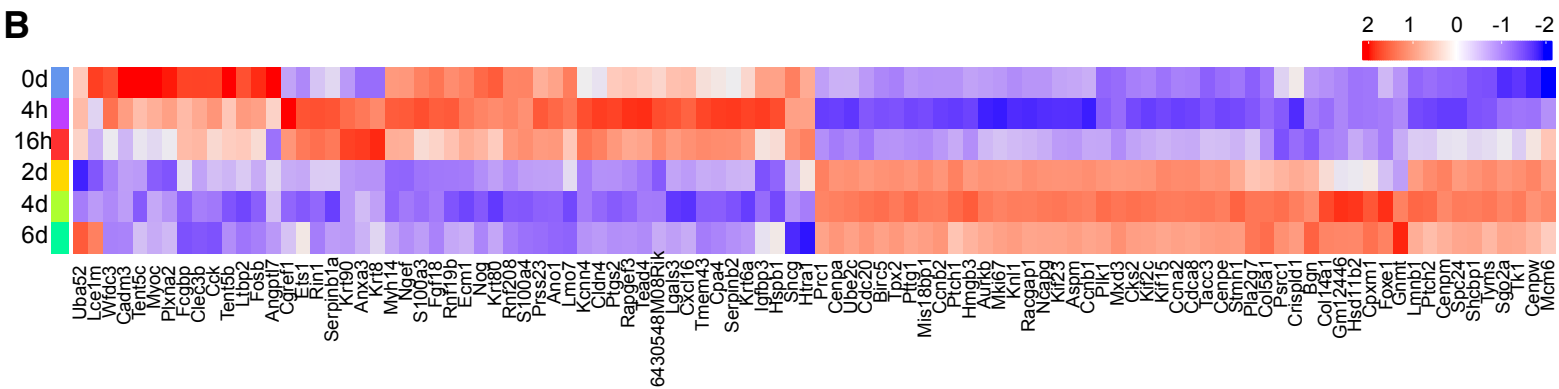

**C**

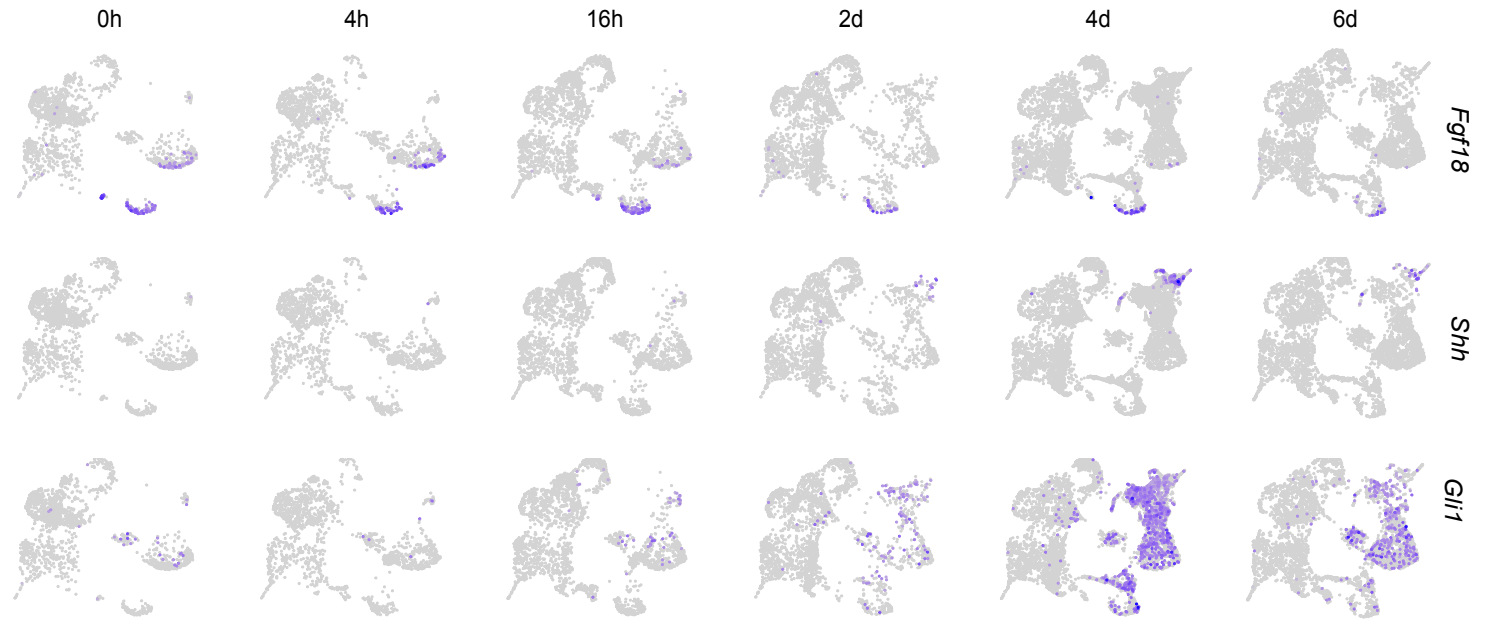

# D

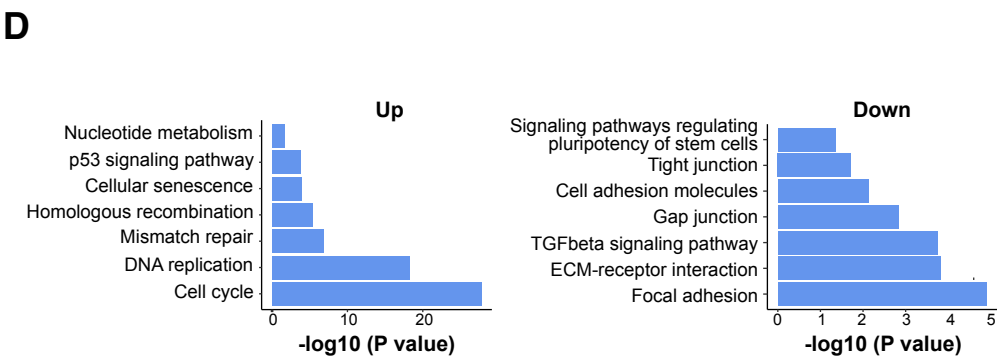

# E

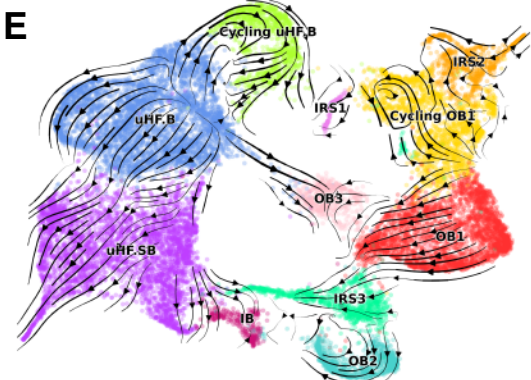

**Figure S8. Single-cell RNA-seq analysis of the dynamics of adult HF cells upon depilation-induced anagen**

(A) Expression of selected genes in HF cells from the six samples. The same UMAP in Figure 5A, colored by the relative expression (gray=low, blue=high). (B) Heatmap of top 50 up and 50 downregulated DE genes in the cells of the OB1 cluster along the time course during hair regeneration. (C) Expression of Fgf18, Shh and Gli1 in HF cells from the six samples. The same UMAP plots in Figure 5D, colored by the relative expression (gray=low, blue=high). (D) Upregulated and downregulated KEGG pathway analysis of the DE genes in the cells of the OB1 cluster along the time course during hair reaeration. (E) RNA velocity plot of integrated HF cells of all samples during hair regeneration.

**A**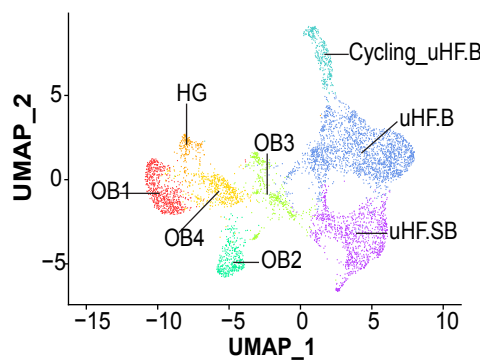**B**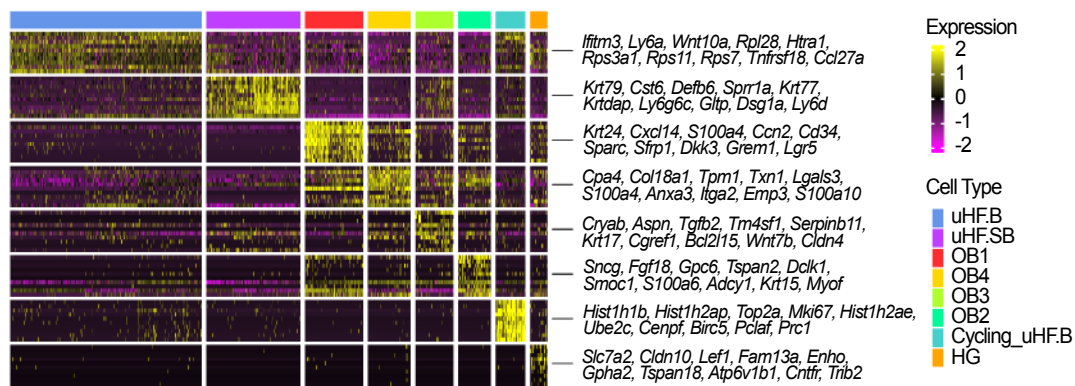**C**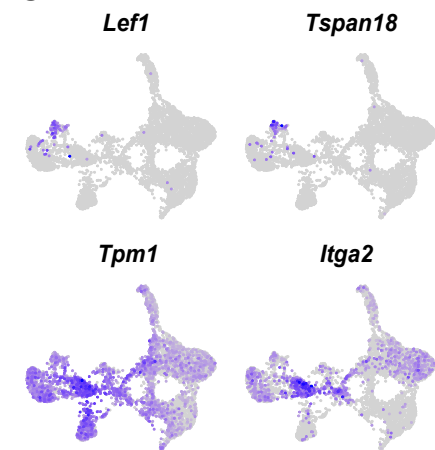**D**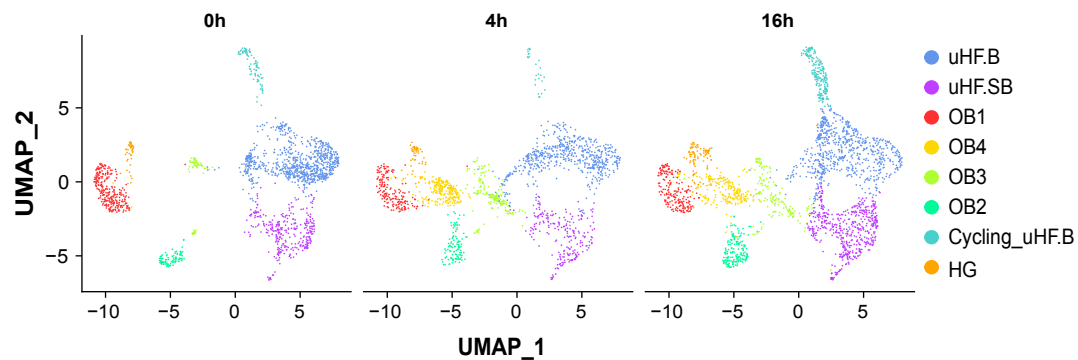**E**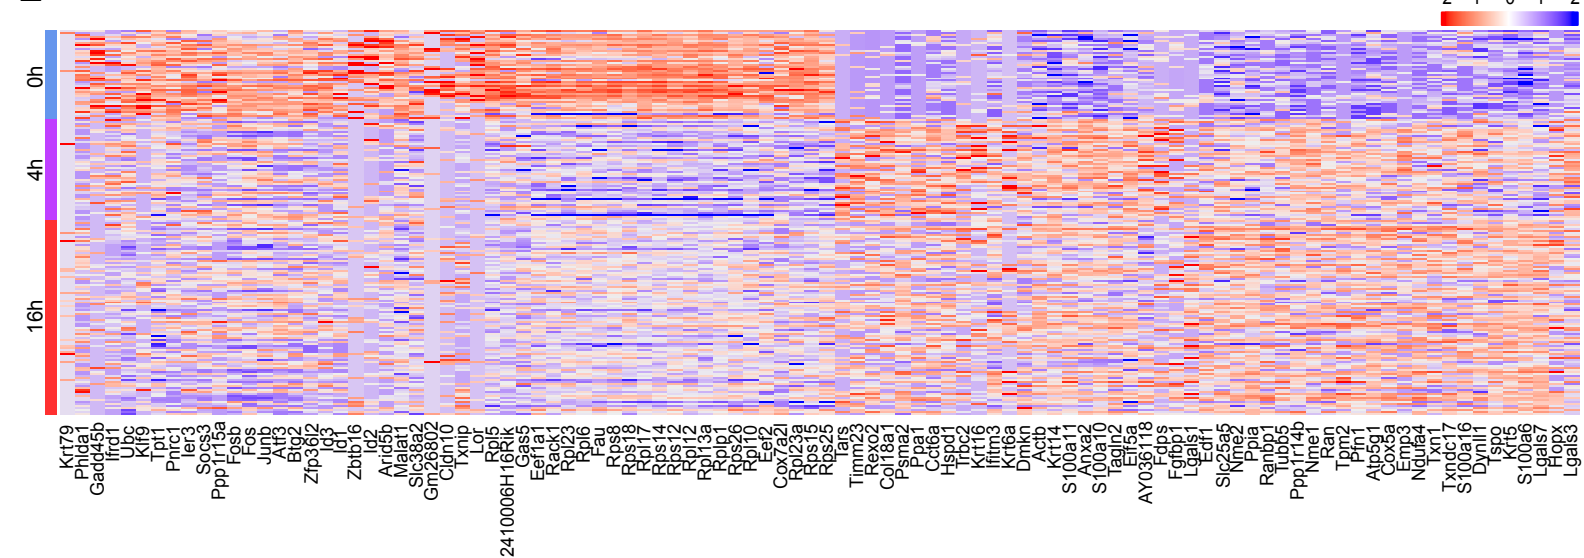

**Figure S9. Rapid responses of the HG and OB populations in gene expression program upon hair depilation.**

(A) UMAP visualization of HF cells in the murine dorsal skin across the three samples at 0, 4 and 16 h post depilation, colored according to the main cell classes. The plot was generated by integration of 1732, 1627 and 2342 HF cells for 0 h, 4 h and 16 h post depilation, respectively. (B) Heatmap of top 10 marker genes for each cell type. (C) Expression plots of marker genes of HG and OB4 cells for (A). The same UMAP in (A), colored by the relative expression (gray=low, blue=high). (D) UMAP visualization of all cells in the dorsal skin sample for each time point post-depilation as indicated. A distinct OB4 cluster appeared even at 4 h post depilation. (E) Heatmap of top 50 up and 50 downregulated genes of HG cells in the dorsal skin samples of 4 h and 16 h compared to 0 h. (F) Up and downregulated KEGG pathway analysis of the DE genes in HG cells in the dorsal skin samples of 4 h and 16 h compared to 0 h.

**A**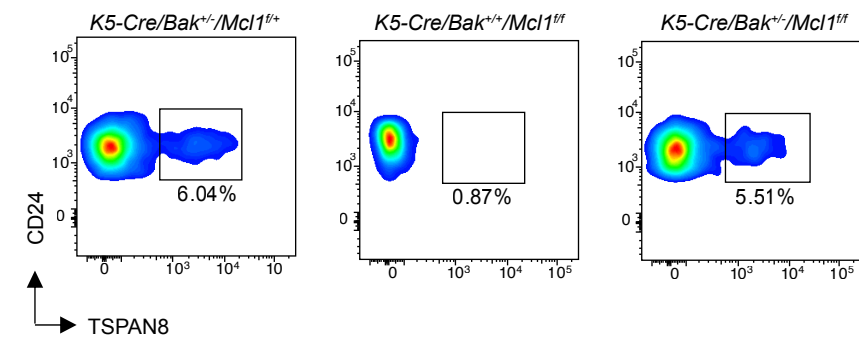**B**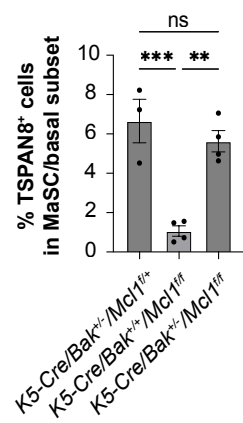**C**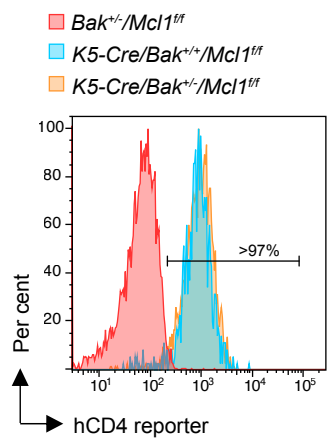**D**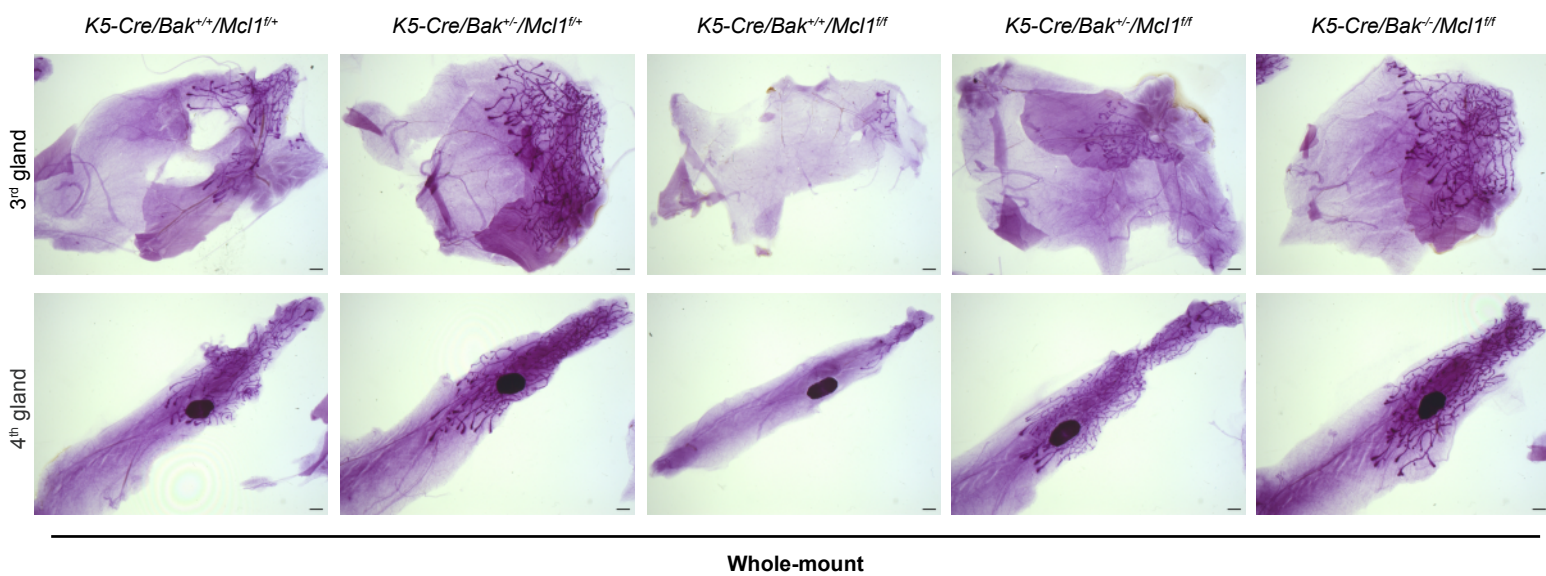**E**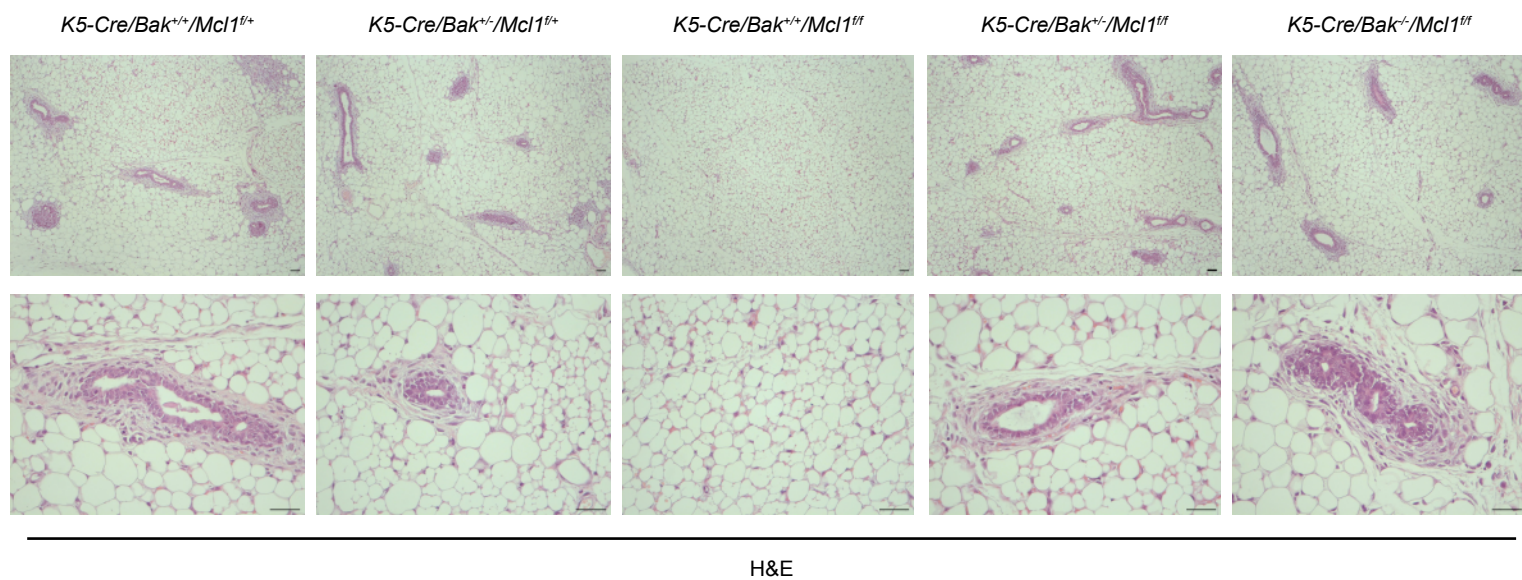

**Figure S10: Deletion of a single *Bak* allele restores TSPAN8<sup>hi</sup> quiescent stem cells and rescue the defects in *Mcl-1*-deficient mammary glands**

(A, B) TSPAN8<sup>hi</sup> quiescent stem cells are eliminated in *Mcl-1*-deficient mammary glands but restored by deletion of a single *Bak* allele. Representative FACS plots showing the TSPAN8<sup>hi</sup> population in the basal compartment (Lin<sup>-</sup>CD29<sup>hi</sup>CD24<sup>+</sup>) (A). Bar graph showing the percentage of cells in the basal population. Error bars represent mean  $\pm$  SEM (B). Mammary glands from 10-12 weeks-old virgin females were processed and analysed. N=3 mice for each genotype. (C) Representative FACS plots demonstrating highly efficient recombination at the floxed *Mcl-1* allele. More than 97% of basal cells from *K5-cre/Bak<sup>+/+</sup>/Mcl-1<sup>ff</sup>* and *K5-cre/Bak<sup>+/-</sup>/Mcl-1<sup>ff</sup>* females expressed the hCD4 reporter but none could be detected in littermate controls. (D, E) Representative images of whole-mounted mammary glands (D) and H&E sections of mammary glands from 5-weeks-old females with indicated genotypes (E). n=3-4 mice for each genotype.

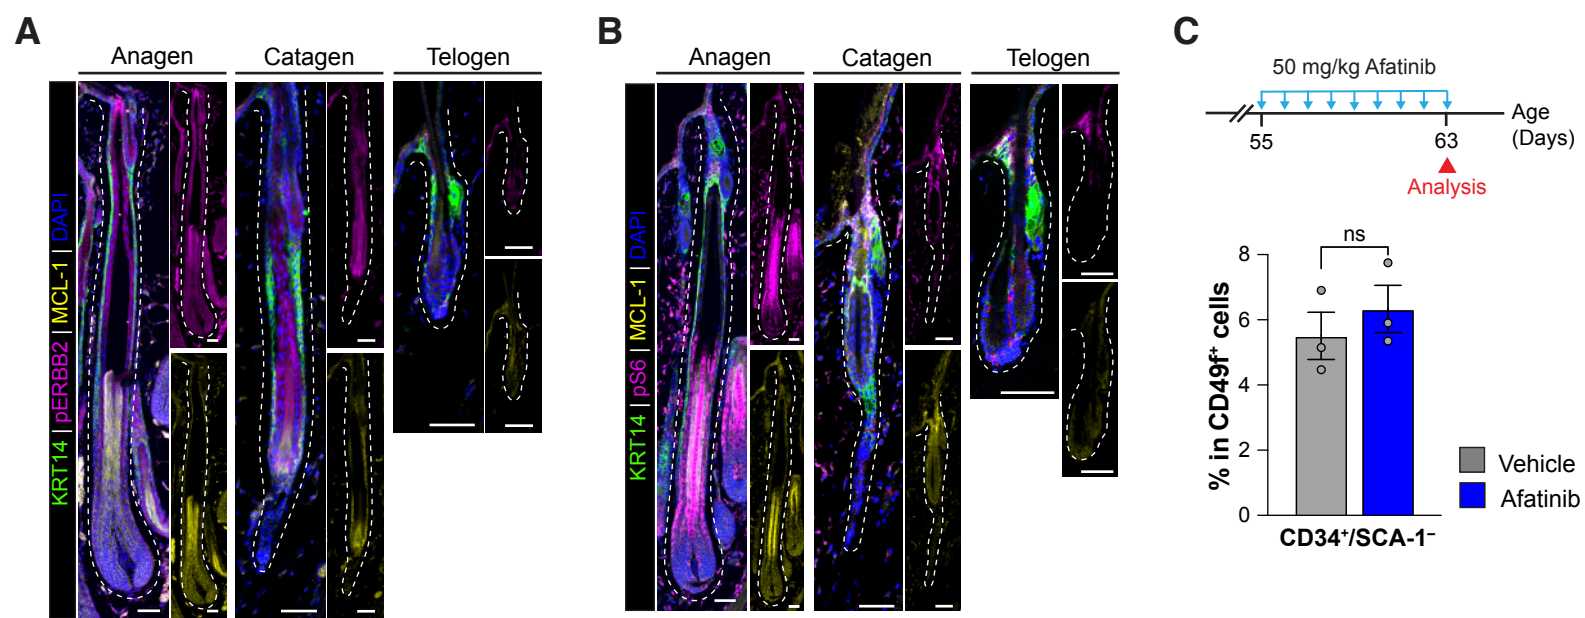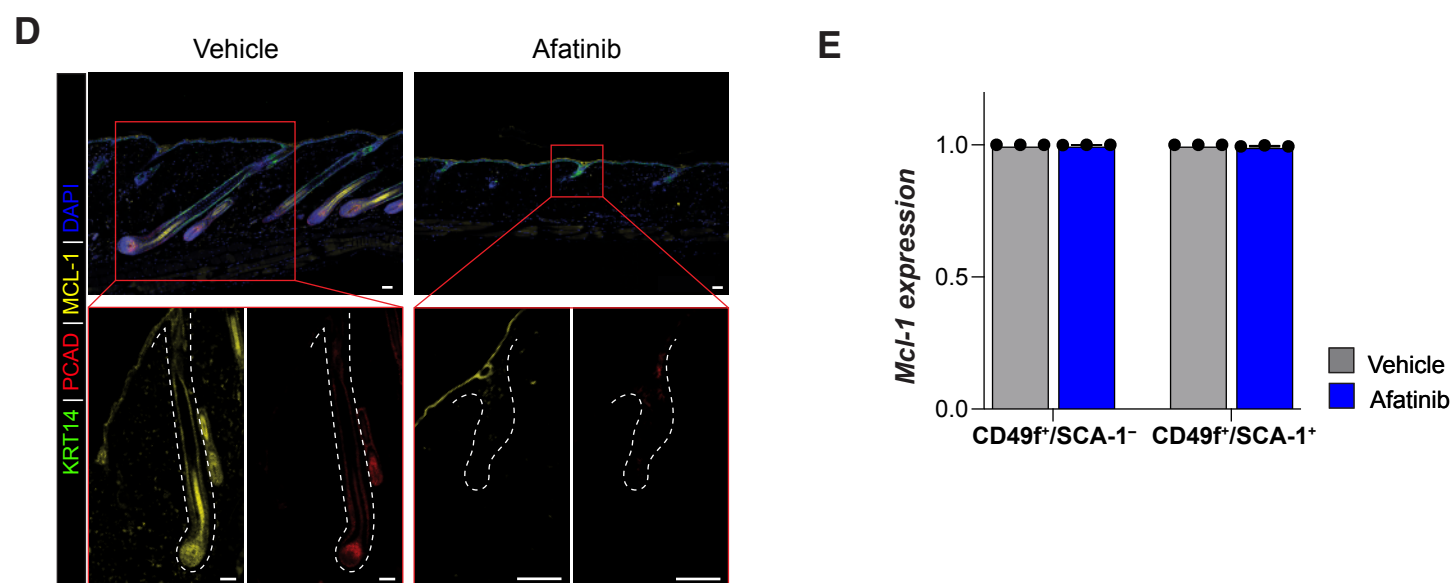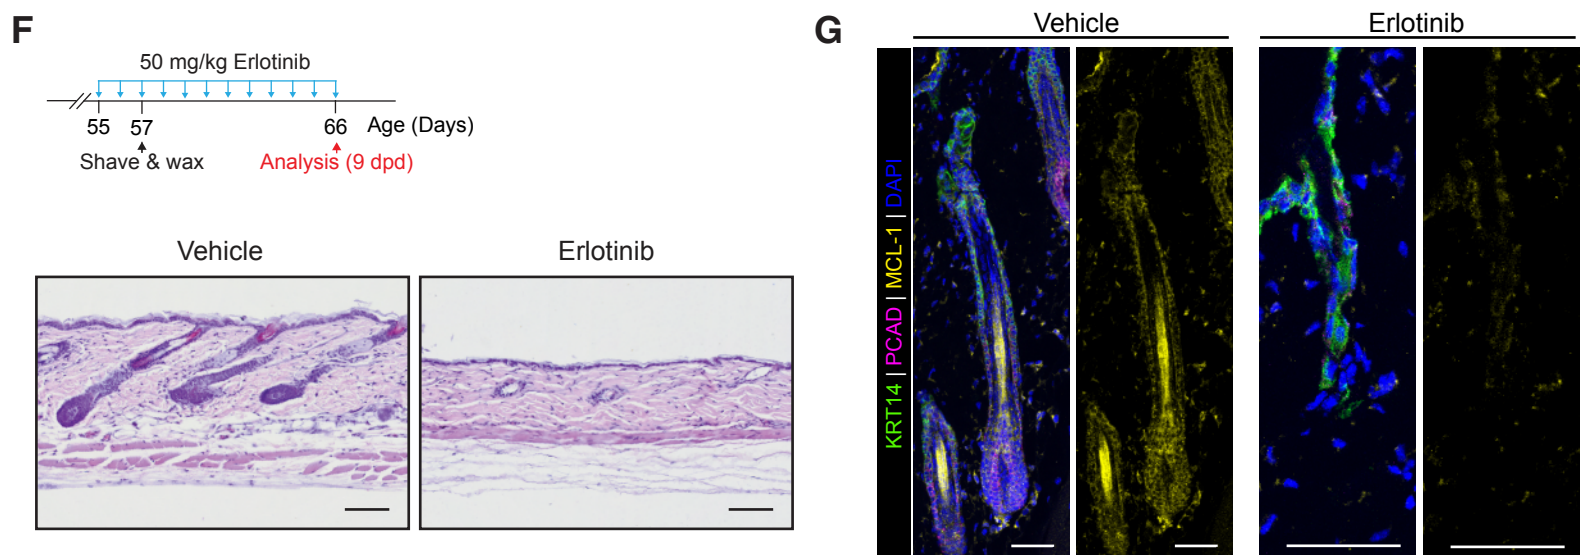

### **Figure S11. Afatinib downregulates MCL-1 protein expression during hair regeneration**

**(A, B)** Representative confocal images showing pERBB2 and MCL-1 (A) and pS6 and MCL-1 (B) expression in HF s at different stages of the HF cycle (anagen, catagen, and telogen). ( $n=3$  mice, scale bars: 50  $\mu\text{m}$ ). KRT14 stains the basal skin layer, and DAPI serves as a nuclear counterstain. **(C)** Afatinib treatment does not affect the quiescent CD34<sup>+</sup> HFSC population. FVB/N mice at P55 received 50 mg/kg afatinib or vehicle daily for 9 days. FACS analysis of CD49f<sup>+</sup>/CD34<sup>+</sup>/SCA-1<sup>-</sup> HFSCs shows no significant difference between treatment groups. Data presented as mean  $\pm$  SEM ( $n=3$  mice per treatment, n.s. = non-significant; Student's t-test). **(D)** Afatinib reduces MCL-1 protein levels, impairing hair regeneration post-depilation. FVB/N mice at P55 were treated with 50 mg/kg afatinib or vehicle daily, with a portion of the dorsal skin shaved and waxed. Confocal analysis at 9 dpd shows reduced MCL-1 expression in afatinib-treated mice ( $n=9$  per group, scale bars: 50  $\mu\text{m}$ ). KRT14 stains the basal skin layer, PCAD marks TACs, and DAPI is used as a nuclear counterstain. **(E)** qPCR analysis of Mcl-1 expression in FACS-sorted CD49f<sup>+</sup>/SCA-1<sup>-</sup> (HF) and CD49f<sup>+</sup>/SCA-1<sup>+</sup> (IFE) populations from afatinib-treated ( $n=3$  per group). **(F, G)** Erlotinib impairs hair regeneration and reduces MCL-1 expression. FVB/N mice at P55 received 50 mg/kg erlotinib or vehicle daily, followed by depilation. H&E-stained sections of dorsal skin at 9 dpd (F) and confocal imaging of MCL-1, KRT14, and PCAD in HF s (G) show reduced MCL-1 expression in erlotinib-treated mice ( $n=3$  per group, scale bars: 50  $\mu\text{m}$ ). DAPI serves as a nuclear counterstain.

## SUPPLEMENTARY METHODS

### Oligonucleotides for real-time PCR

| mRNA               | Sequence                                                              | Source                      |
|--------------------|-----------------------------------------------------------------------|-----------------------------|
| <i>Mcl-1</i> set 1 | (1) 5'-AGAGCGCTGGAGACCCTG-3'<br>(2) 5'-CTATCTTATTAGATATGCCAGACC-3'    | Integrated DNA Technologies |
| <i>Mcl-1</i> set 2 | (1) 5'-AAGTCCTCGCCTGCGTCAGCA-3'<br>(2) 5'-GTTCAAGCCGATGACCGCGTTTCT-3' | Integrated DNA Technologies |
| <i>Bim</i>         | (1) 5'-CGACAGTCTCAGGAGGAACC-3'<br>(2) 5'-CCTTCTCCATACCAGACGGA-3'      | Integrated DNA Technologies |
| <i>Bak</i>         | (1) 5'-CTTTGGCTACCGTCTGGC-3'<br>(2) 5'-CAACCGCCTCTCTGTGCGA-3'         | Integrated DNA Technologies |
| <i>Trp53</i>       | (1) 5'- TGGAAGACAGGCAGACTTTTC-3'<br>(2) 5'-GATGGTAAGGATAGGTCGGC-3'    | Integrated DNA Technologies |
| <i>B-Actin</i>     | (1) 5'-CACTGTCGAGTCGCGTCCA-3'<br>(2) 5'-CCACGATGGAGGGGAATACAG-3'      | Integrated DNA Technologies |
